# Supplementary material for: Modifications involved by acetylacetone in properties of sol–gel derived Y3Al5O12:Tb3+– II: optical features
Source: Royal Society of Chemistry journal article supplement (doi:10.1039/c0dt00090f), 2010-01-01
Supplement: c0dt00090f.pdf [file c0dt00090f.pdf]

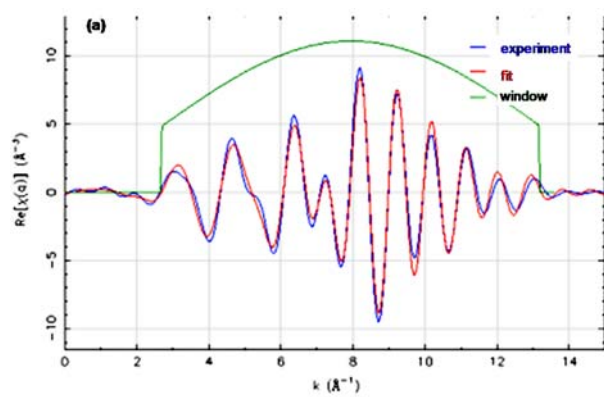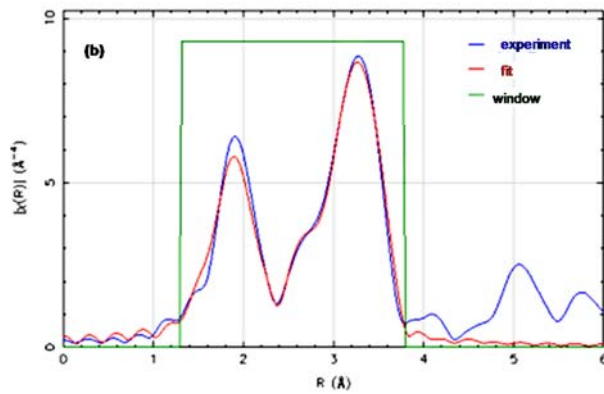

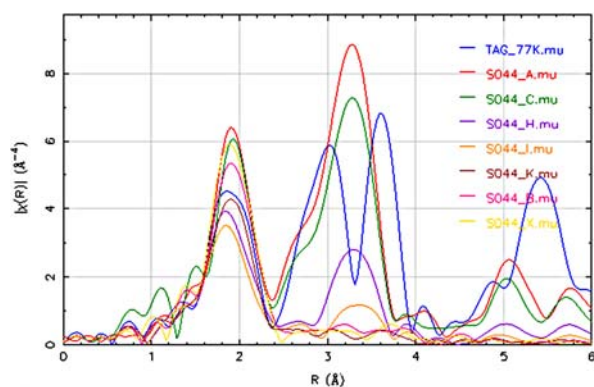

| Sample (Heating temperature)     | Absorbing atom | N       | d (Å)                                                | Sigma <sup>2</sup> *10 <sup>3</sup> (Å <sup>2</sup> ) | R <sub>p</sub> (%)   |                                 |
|----------------------------------|----------------|---------|------------------------------------------------------|-------------------------------------------------------|----------------------|---------------------------------|
| YAG:Tb(20%)<br>R <sub>c</sub> =0 | xerogel        | O       | 3.5±0.5 (4)<br>3.1±0.5 (4)                           | 2.33 (2.30)<br>2.46 (2.43)                            | 4.99<br>4.99         | 0.748<br>ε <sub>int</sub> =1.43 |
|                                  |                | Al      | 1.6±0.7 (nd)                                         | 3.30 (nd)                                             | 16.9                 |                                 |
|                                  |                | Y       | 0.7±0.4 (3.2)                                        | 3.79 (3.67)                                           | 8.77                 |                                 |
|                                  | 200°C          | O       | 3.9±0.5 (4)<br>2.3±0.7 (4)                           | 2.34 (2.30)<br>2.47 (2.43)                            | 5.60<br>5.60         | 1.02<br>ε <sub>int</sub> =1.47  |
|                                  |                | Al      | 1.6±0.8 (nd)                                         | 3.29 (nd)                                             | 15.41                |                                 |
|                                  |                | Y       | 0.6±0.5 (3.2)                                        | 3.81 (3.67)                                           | 7.95                 |                                 |
|                                  | 400°C          | O       | 4.0±0.4 (4)<br>2.3±0.6 (4)                           | 2.32 (2.30)<br>2.45 (2.43)                            | 9.54<br>9.54         | 0.357<br>ε <sub>int</sub> =1.00 |
|                                  |                | Al      | 1.3±0.4 (nd)                                         | 3.15 (nd)                                             | 14.2                 |                                 |
|                                  |                | Y       | 1.7±0.5 (3.2)                                        | 3.71 (3.67)                                           | 13.6                 |                                 |
|                                  |                | Tb      | 0.8±0.6 (0.8)                                        | 3.71 (3.67)                                           | 13.6                 |                                 |
|                                  | 600°C          | O       | 3.9±0.4 (4)<br>1.9±0.6 (4)                           | 2.32 (2.30)<br>2.45 (2.43)                            | 10.6<br>10.6         | 0.283<br>ε <sub>int</sub> =0.90 |
|                                  |                | Al      | 1.4±0.4 tetra (2)                                    | 3.14 (3.00)                                           | 11.9                 |                                 |
|                                  |                | Y       | 1.3±0.9 (3.2)                                        | 3.71 (3.67)                                           | 12.1                 |                                 |
|                                  |                | Tb      | 0.6±0.9 (0.8)                                        | 3.71 (3.67)                                           | 12.1                 |                                 |
|                                  | 700°C          | O       | 4.1±0.4 (4)<br>2.3±0.6 (4)                           | 2.32 (2.30)<br>2.44 (2.43)                            | 10.6<br>10.6         | 0.329<br>ε <sub>int</sub> =0.92 |
|                                  |                | Al      | 1.3±0.3 tetra (2)                                    | 3.14 (3.00)                                           | 11.3                 |                                 |
|                                  |                | Y       | 2.0±0.4 (3.2)                                        | 3.71 (3.67)                                           | 11.9                 |                                 |
|                                  |                | Tb      | 0.8±0.6 (0.8)                                        | 3.71 (3.67)                                           | 11.9                 |                                 |
|                                  | 800°C          | O       | 3.0±0.3 (4)<br>2.8±0.3 (4)                           | 2.31 (2.30)<br>2.44 (2.43)                            | 4.73<br>4.73         | 1.26<br>ε <sub>int</sub> =1.56  |
|                                  |                | Al      | 1.2±0.3 tetra (2)<br>2.1±1.0 octa (4)<br>2.1±0.8 (4) | 3.04 (3.00)<br>3.40 (3.35)<br>3.71 (3.67)             | 4.22<br>11.6<br>4.88 |                                 |
|                                  |                | Y       | 2.8±0.3 (3.2)                                        | 3.71 (3.67)                                           | 4.88                 |                                 |
|                                  |                | Tb      | 1.2±0.3 (0.8)                                        | 3.71 (3.67)                                           | 4.88                 |                                 |
|                                  | 1100°C         | O       | 4 (4)<br>4 (4)                                       | 2.32 (2.30)<br>2.46 (2.43)                            | 5.70<br>5.70         | 3.56<br>ε <sub>int</sub> =1.83  |
|                                  |                | Al      | 2 tetra (2)<br>4 octa (4)<br>4 (4)                   | 3.04 (3.00)<br>3.38 (3.35)<br>3.71 (3.67)             | 3.24<br>9.26<br>2.66 |                                 |
| Y                                |                | 3 (3.2) | 3.70 (3.67)                                          | 2.66                                                  |                      |                                 |
| Tb                               |                | 1 (0.8) | 3.70 (3.67)                                          | 2.66                                                  |                      |                                 |

| Sample (Heating temperature)     | Absorbing atom | N              | d (Å)                      | Sigma <sup>2</sup> *10 <sup>3</sup> (Å <sup>2</sup> ) | R <sub>F</sub> (%)             |                                 |
|----------------------------------|----------------|----------------|----------------------------|-------------------------------------------------------|--------------------------------|---------------------------------|
| YAG:Tb(20%)<br>R <sub>c</sub> =1 | xerogel        | O              | 5.0±0.5 (4)<br>2.6±0.9 (4) | 2.34 (2.30)<br>2.47 (2.43)                            | 6.48<br>6.48                   | 1.03<br>ε <sub>int</sub> =0.93  |
|                                  |                | Al             | 1.0±0.6 (nd)               | 3.33 (nd)                                             | 13.3                           |                                 |
|                                  |                | Y              | 0.4±0.5 (3.2)              | 3.82 (3.67)                                           | 6.73                           |                                 |
|                                  | 200°C          | O              | 4.2±0.5 (4)<br>2.9±0.7 (4) | 2.34 (2.30)<br>2.47 (2.43)                            | 6.40<br>6.40                   | 0.768<br>ε <sub>int</sub> =1.30 |
|                                  |                | Al             | 1.1±0.6 (nd)               | 3.27 (nd)                                             | 12.0                           |                                 |
|                                  |                | Y              | 0.8±0.4 (3.2)              | 3.77 (3.67)                                           | 7.07                           |                                 |
|                                  |                | Tb             | 0.6±0.6 (3.2)              | 3.77 (3.67)                                           | 7.07                           |                                 |
|                                  | 400°C          | O              | 3.2±0.8 (4)<br>2.8±1.0 (4) | 2.31 (2.30)<br>2.44 (2.43)                            | 6.33<br>6.33                   | 0.678<br>ε <sub>int</sub> =1.09 |
|                                  |                | Al             | 0.9±0.2 (nd)               | 3.20 (nd)                                             | 10.4                           |                                 |
|                                  |                | Y              | 0.6±0.5 (3.2)              | 3.71 (3.67)                                           | 7.27                           |                                 |
|                                  |                | Tb             | 0.2±0.8 (0.8)              | 3.71 (3.67)                                           | 7.27                           |                                 |
|                                  | 600°C          | O              | 2.6±0.5 (4)<br>2.2±0.6 (4) | 2.29 (2.30)<br>2.42 (2.43)                            | 5.80<br>5.80                   | 1.05<br>ε <sub>int</sub> =1.18  |
|                                  |                | Al             | 0.9±0.2 tetra (2)          | 3.11 (3.00)                                           | 5.22                           |                                 |
|                                  |                | Y              | 1.4±0.3 (0.3)              | 3.69 (3.67)                                           | 5.74                           |                                 |
|                                  |                | Tb             | 0.9±0.4 (0.8)              | 3.69 (3.67)                                           | 5.74                           |                                 |
|                                  | 700°C          | O              | 2.5±0.5 (4)<br>2.5±0.5 (4) | 2.29 (2.30)<br>2.42 (2.43)                            | 4.72<br>4.72                   | 0.580<br>ε <sub>int</sub> =1.10 |
|                                  |                | Al             | 1.1±0.2 tetra (2)          | 3.06 (3.00)                                           | 6.32                           |                                 |
|                                  |                | Y              | 2.8±0.3 (3.2)              | 3.71 (3.67)                                           | 5.70                           |                                 |
|                                  |                | Tb             | 1.4±0.4 (0.8)              | 3.71 (3.67)                                           | 5.70                           |                                 |
|                                  | 800°C          | O              | 2.8±0.6 (4)<br>3.6±0.9 (4) | 2.31 (2.30)<br>2.44 (2.43)                            | 3.84<br>3.84                   | 2.21<br>ε <sub>int</sub> =1.80  |
|                                  |                | Al             | 2.0±0.3 tetra (2)          | 3.04 (3.00)                                           | 3.98                           |                                 |
|                                  |                |                | 4.1±0.9 octa (4)           | 3.40 (3.35)                                           | 9.58                           |                                 |
|                                  |                |                | 3.9±0.3 (4)                | 3.71 (3.67)                                           | 3.84                           |                                 |
|                                  |                | Y              | 2.7±0.6 (3.2)              | 3.71 (3.67)                                           | 3.84                           |                                 |
| Tb                               | 1.3±0.6 (0.8)  | 3.71 (3.67)    | 3.84                       |                                                       |                                |                                 |
| 1100°C                           | O              | 4 (4)<br>4 (4) | 2.32 (2.30)<br>2.45 (2.43) | 6.2<br>6.2                                            | 2.94<br>ε <sub>int</sub> =1.80 |                                 |
|                                  | Al             | 2 tetra (2)    | 3.04 (3.00)                | 2.58                                                  |                                |                                 |
|                                  |                | 4 octa (4)     | 3.38 (3.35)                | 8.01                                                  |                                |                                 |
|                                  |                | 4 (4)          | 3.71 (3.67)                | 3.55                                                  |                                |                                 |
|                                  | Y              | 3 (3.2)        | 3.70 (3.67)                | 3.55                                                  |                                |                                 |
| Tb                               | 1 (0.8)        | 3.70 (3.67)    | 3.55                       |                                                       |                                |                                 |
